# Supplementary material
Source: Springer Nature journal article supplement (https://www.springermedizin.de/resource/supplementary/12958_2006_334_MOESM1_ESM.pdf/9567652)

L $\beta$ T2

---

RT+

RT-

Pit

---

RT+

RT-

Brain

---

RT+

RT-

H2O

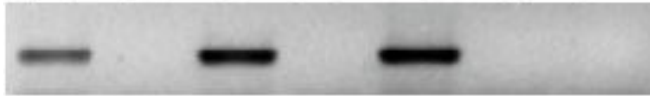

Supplement: MOESM1 [file 9567652]
